# Supplementary material
Source: publisher site journal article supplement (https://www.dovepress.com/article/421383)
Supplement: Supplementary file 1 [file get_supplementary_file.php]

## Supplementary Material

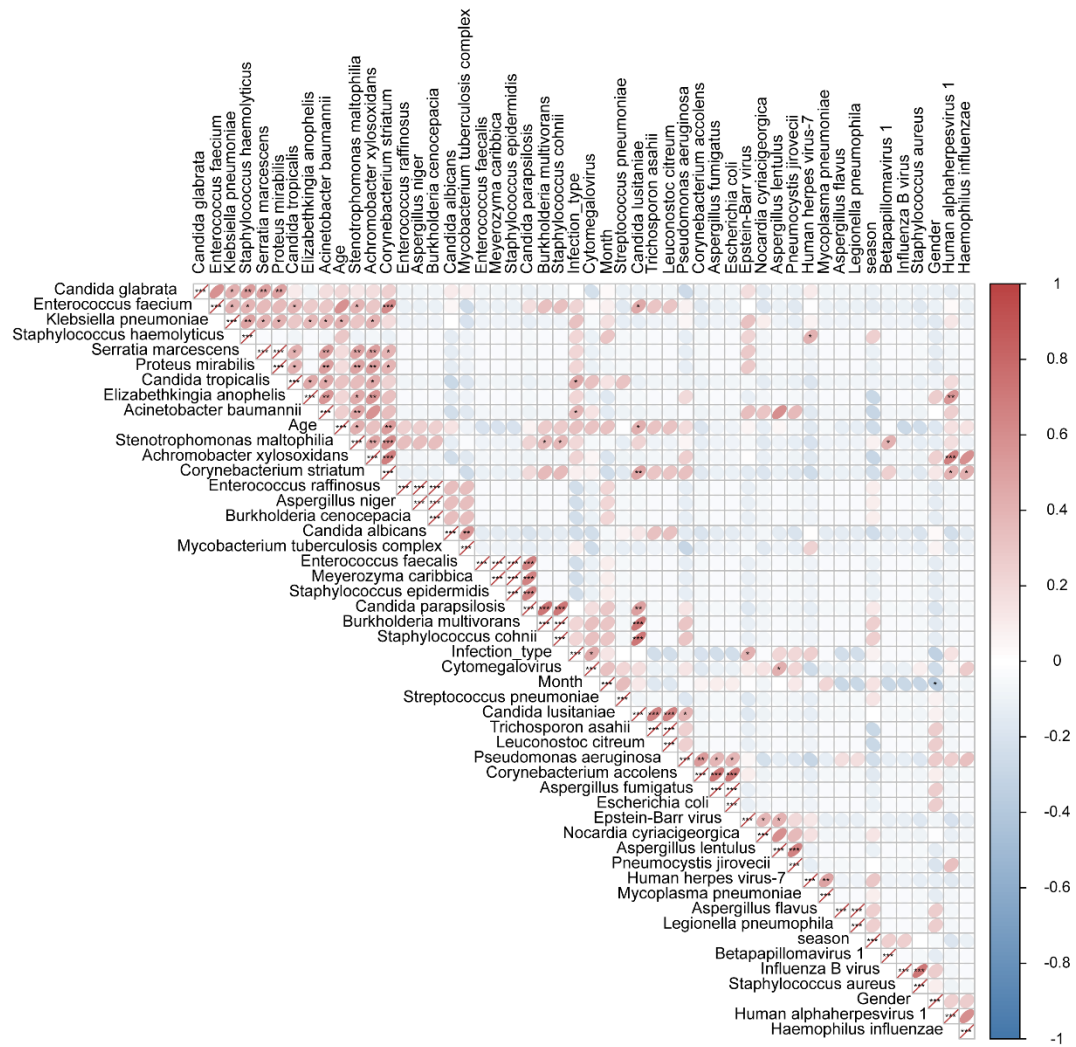

Supplementary Figure 1. Correlation analysis of pathogens in samples with at least one consistent pathogen between mNGS and CMT. \*:  $P < 0.05$ , \*\*:  $P < 0.01$ ; \*\*\*:  $P < 0.001$ .

**Supplementary table 1.** Sample details of enrolled cases. "-" in the CMT results section indicates that no corresponding test was performed.

| Patient ID | Age | Gender | Sample ID | mNGS      |          |                                                                                                                                                                                                                                                                                                                        | CMT           |                         |                |                          |                                                                      |        |           |        |   |
|------------|-----|--------|-----------|-----------|----------|------------------------------------------------------------------------------------------------------------------------------------------------------------------------------------------------------------------------------------------------------------------------------------------------------------------------|---------------|-------------------------|----------------|--------------------------|----------------------------------------------------------------------|--------|-----------|--------|---|
|            |     |        |           | Date      | Specimen | Pathogens                                                                                                                                                                                                                                                                                                              | Blood culture | BALF culture            | Sputum culture | Other culture            | PCR Detection of respiratory pathogens                               | G test | GeneXpert | T-spot |   |
| P1         | 70  | 1      | 1         | 2021/4/7  | BALF     | Mycobacterium tuberculosis complex-166<br>Pseudomonas aeruginosa-10610<br>Achromobacter xylosoxidans-8210<br>Staphylococcus epidermidis-25899<br>Serratia marcescens-34<br>Candida albicans-178                                                                                                                        | -             | -                       | Negative       | -                        | -                                                                    | -      | -         | -      | - |
| P2         | 53  | 1      | 2         | 2021/4/8  | BALF     | Streptococcus intermedius-313893                                                                                                                                                                                                                                                                                       | Negative      | -                       | Negative       | -                        | Negative                                                             | 68     | -         | -      |   |
| P3         | 77  | 2      | 3         | 2021/4/25 | BALF     | Stenotrophomonas maltophilia-4723<br>Elizabethkingia anophelis-637<br>Enterococcus faecium-36<br>Acinetobacter baumannii-2803<br>Achromobacter xylosoxidans-4779<br>Klebsiella pneumoniae-276<br>Pseudomonas aeruginosa-184<br>Corynebacterium striatum-2036<br>Candida tropicalis-328<br>Human alphaherpesvirus 1-522 | Negative      | Acinetobacter baumannii | -              | Candida glabrata (Urine) | Respiratory syncytial virus<br>Human adenovirus<br>Influenza A virus | -      | -         | -      |   |

| Patient ID | Age | Gender | Sample ID | mNGS      |          |                                                                                                                                                                                                                                                                                                         | CMT           |                                                    |                |                               |                                        |        |           |        |          |
|------------|-----|--------|-----------|-----------|----------|---------------------------------------------------------------------------------------------------------------------------------------------------------------------------------------------------------------------------------------------------------------------------------------------------------|---------------|----------------------------------------------------|----------------|-------------------------------|----------------------------------------|--------|-----------|--------|----------|
|            |     |        |           | Date      | Specimen | Pathogens                                                                                                                                                                                                                                                                                               | Blood culture | BALF culture                                       | Sputum culture | Other culture                 | PCR Detection of respiratory pathogens | G test | GeneXpert | T-spot |          |
| P4         | 67  | 1      | 4         | 2021/5/10 | BALF     | Epstein-Barr virus-53                                                                                                                                                                                                                                                                                   | -             | -                                                  | -              | -                             | -                                      | -      | 122       | -      | Negative |
| P5         | 67  | 1      | 5         | 2021/5/25 | BALF     | Staphylococcus aureus-15473<br>Cytomegalovirus-7                                                                                                                                                                                                                                                        | Negative      | Methicillin-resistant Staphylococcus aureus (MRSA) | -              | -                             | -                                      | -      | -         | -      | -        |
| P6         | 47  | 1      | 6         | 2021/6/11 | BALF     | Pseudomonas aeruginosa-63982<br>Klebsiella pneumoniae-161<br>Corynebacterium striatum-18319<br>Achromobacter xylooxidans-2147<br>Stenotrophomonas maltophilia-5963<br>Burkholderia cepacia complex-1155<br>Serratia marcescens-2935<br>Acinetobacter baumannii-278349<br>Elizabethkingia anophelis-4065 | -             | -                                                  | -              | Klebsiella pneumoniae (Urine) | -                                      | -      | -         | -      |          |

| Patient ID | Age | Gender | Sample ID | mNGS      |          |                                                                                                                                                                                                                                                                                                                                  | CMT           |                              |                              |               |                                        |        |           |        |          |
|------------|-----|--------|-----------|-----------|----------|----------------------------------------------------------------------------------------------------------------------------------------------------------------------------------------------------------------------------------------------------------------------------------------------------------------------------------|---------------|------------------------------|------------------------------|---------------|----------------------------------------|--------|-----------|--------|----------|
|            |     |        |           | Date      | Specimen | Pathogens                                                                                                                                                                                                                                                                                                                        | Blood culture | BALF culture                 | Sputum culture               | Other culture | PCR Detection of respiratory pathogens | G test | GeneXpert | T-spot |          |
| P7         | 76  | 1      | 7         | 2021/6/25 | BALF     | Enterococcus faecium-7622<br>Serratia marcescens-485<br>Acinetobacter baumannii-1415<br>Achromobacter xylooxidans-1064<br>Stenotrophomonas maltophilia-21293<br>Corynebacterium striatum-74438<br>Klebsiella pneumoniae-400<br>Proteus mirabilis-483<br>Candida glabrata-1482<br>Candida tropicalis-176<br>Epstein-Barr virus-18 | -             | Stenotrophomonas maltophilia | Stenotrophomonas maltophilia | -             | -                                      | -      | -         | -      | -        |
| P8         | 69  | 2      | 8         | 2021/7/7  | BALF     | Pseudomonas aeruginosa-326384<br>Haemophilus influenzae-71<br>Staphylococcus aureus-34                                                                                                                                                                                                                                           | -             | Negative                     | -                            | -             | -                                      | -      | 6.5       | -      | Negative |
| P9         | 68  | 1      | 9         | 2021/7/12 | BALF     | Corynebacterium striatum-977<br>Pseudomonas aeruginosa-427<br>Staphylococcus aureus-343<br>Proteus mirabilis-174<br>Enterococcus avium-143<br>Kerstersia gyiorum-89<br>Providencia rettgeri-34                                                                                                                                   | -             | Proteus mirabilis            | Proteus mirabilis            | -             | -                                      | -      | -         | -      | -        |

| Patient ID | Age | Gender | Sample ID | mNGS      |          |                                                                                              | CMT           |              |                  |                  |                                        |        |           |        |          |
|------------|-----|--------|-----------|-----------|----------|----------------------------------------------------------------------------------------------|---------------|--------------|------------------|------------------|----------------------------------------|--------|-----------|--------|----------|
|            |     |        |           | Date      | Specimen | Pathogens                                                                                    | Blood culture | BALF culture | Sputum culture   | Other culture    | PCR Detection of respiratory pathogens | G test | GeneXpert | T-spot |          |
| P10        | 70  | 2      | 10        | 2021/7/12 | blood    | Negative                                                                                     | Negative      | -            | -                | -                | -                                      | EBV    | 10        | -      | -        |
| P11        | 49  | 2      | 11        | 2021/7/13 | BALF     | Negative                                                                                     | -             | Negative     | -                | -                | -                                      | -      | -         | -      | Negative |
| P12        | 66  | 2      | 12        | 2021/7/16 | BALF     | Negative                                                                                     | -             | Negative     | Candida albicans | -                | -                                      | -      | 20        | -      | -        |
| P13        | 55  | 2      | 13        | 2021/7/23 | BALF     | Pseudomonas aeruginosa-69                                                                    | -             | Negative     | Negative         | -                | -                                      | -      | 11.2      | -      | -        |
| P14        | 69  | 1      | 14        | 2021/7/27 | Sputum   | Enterococcus faecium-56723<br>Staphylococcus haemolyticus-232341<br>Candida tropicalis-30572 | -             | -            | Candida albicans | Negative (Urine) | -                                      | -      | -         | -      | -        |
| P15        | 37  | 1      | 15        | 2021/7/28 | BALF     | Negative                                                                                     | -             | Negative     | -                | -                | -                                      | -      | -         | -      | -        |
| P16        | 75  | 2      | 16        | 2021/7/30 | BALF     | Mycobacterium tuberculosis complex-373323<br>Candida albicans-268<br>Epstein-Barr virus-1184 | -             | Negative     | Candida albicans | -                | -                                      | -      | -         | -      | -        |
| P17        | 77  | 1      | 17        | 2021/7/31 | blood    | Negative                                                                                     | Negative      | -            | Candida albicans | -                | -                                      | -      | -         | -      | -        |

| Patient ID | Age | Gender | Sample ID | mNGS      |          |                                                                                                                                  | CMT           |                        |                         |               |                                        |        |           |        |
|------------|-----|--------|-----------|-----------|----------|----------------------------------------------------------------------------------------------------------------------------------|---------------|------------------------|-------------------------|---------------|----------------------------------------|--------|-----------|--------|
|            |     |        |           | Date      | Specimen | Pathogens                                                                                                                        | Blood culture | BALF culture           | Sputum culture          | Other culture | PCR Detection of respiratory pathogens | G test | GeneXpert | T-spot |
| P17        |     |        | 18        | 2021/8/2  | BALF     | Candida tropicalis-6170<br>Cytomegalovirus-4<br>Human herpesvirus 6B-9                                                           | Negative      | -                      | Candida albicans        | -             | -                                      | -      | -         | -      |
| P18        | 74  | 1      | 19        | 2021/8/2  | Pus      | Filifactor alocis-1327                                                                                                           | Negative      | Negative               | Acinetobacter baumannii | -             | -                                      | 10     | -         | -      |
| P18        |     |        | 22        | 2021/8/18 | BALF     | Pseudomonas aeruginosa-2530<br>Klebsiella pneumoniae-417<br>Candida albicans-798<br>Cytomegalovirus-14<br>Epstein-Barr virus-319 | Negative      | Klebsiella pneumoniae  | Candida albicans        | -             | -                                      | -      | -         | -      |
| P19        | 71  | 2      | 20        | 2021/8/8  | BALF     | Negative                                                                                                                         | -             | Pseudomonas aeruginosa | -                       | -             | -                                      | -      | -         | -      |
| P20        | 71  | 1      | 21        | 2021/8/16 | BALF     | Epstein-Barr virus-5                                                                                                             | -             | Negative               | Candida albicans        | -             | -                                      | 19.9   | -         | -      |
| P20        |     |        | 23        | 2021/8/20 | Tissue   | Negative                                                                                                                         | -             | Negative               | Candida albicans        | -             | -                                      | -      | -         | -      |

| Patient ID | Age | Gender | Sample ID | mNGS       |          |                                                                                                                          | CMT           |                            |                   |                     |                                        |        |           |          |   |
|------------|-----|--------|-----------|------------|----------|--------------------------------------------------------------------------------------------------------------------------|---------------|----------------------------|-------------------|---------------------|----------------------------------------|--------|-----------|----------|---|
|            |     |        |           | Date       | Specimen | Pathogens                                                                                                                | Blood culture | BALF culture               | Sputum culture    | Other culture       | PCR Detection of respiratory pathogens | G test | GeneXpert | T-spot   |   |
| P21        | 52  | 1      | 24        | 2021/8/27  | Tissue   | Negative                                                                                                                 | -             | Negative                   | -                 | -                   | -                                      | -      | -         | -        | - |
| P21        |     |        | 50        | 2021/12/27 | BALF     | Negative                                                                                                                 | Negative      | Negative                   | Negative          | -                   | -                                      | -      | -         | -        | - |
| P22        | 59  | 1      | 25        | 2021/8/31  | BALF     | Enterococcus faecalis-6081<br>Staphylococcus epidermidis-204485<br>Meyerozyma caribbica-6541<br>Candida parapsilosis-112 | -             | Staphylococcus epidermidis | -                 | -                   | -                                      | -      | -         | -        | - |
| P23        | 63  | 1      | 26        | 2021/9/1   | BALF     | Enterococcus faecalis-9656<br>Candida tropicalis-119<br>Human herpes virus 7-10                                          | Negative      | Negative                   | -                 | Negative (Urine)    | -                                      | -      | -         | -        | - |
| P24        | 53  | 2      | 27        | 2021/9/7   | BALF     | Staphylococcus aureus-100                                                                                                | -             | Negative                   | -                 | -                   | -                                      | -      | -         | -        | - |
| P25        | 63  | 1      | 28        | 2021/9/13  | BALF     | Pneumocystis jirovecii-2439<br>Human alphaherpesvirus 1-18                                                               | -             | Negative                   | Filamentous fungi | -                   | -                                      | 743.9  | -         | Negative |   |
| P26        | 66  | 2      | 29        | 2021/9/24  | BALF     | Negative                                                                                                                 | -             | Negative                   | -                 | -                   | -                                      | -      | Negative  | -        |   |
| P27        | 38  | 2      | 30        | 2021/9/30  | BALF     | Mycoplasma pneumoniae-869                                                                                                | -             | Negative                   | -                 | Negative (Tracheal) | -                                      | -      | -         | -        |   |

| Patient ID | Age | Gender | Sample ID | mNGS       |          |                                                                          | CMT           |                  |                    |               |                                        |        |           |          |
|------------|-----|--------|-----------|------------|----------|--------------------------------------------------------------------------|---------------|------------------|--------------------|---------------|----------------------------------------|--------|-----------|----------|
|            |     |        |           | Date       | Specimen | Pathogens                                                                | Blood culture | BALF culture     | Sputum culture     | Other culture | PCR Detection of respiratory pathogens | G test | GeneXpert | T-spot   |
|            |     |        |           |            |          |                                                                          |               |                  |                    |               | secretion)                             |        |           |          |
| P28        | 60  | 2      | 31        | 2021/9/30  | BALF     | Negative                                                                 | -             | Negative         | -                  | -             | -                                      | -      | Negative  | -        |
| P29        | 67  | 1      | 32        | 2021/10/8  | BALF     | Mycoplasma pneumoniae-1<br>Human herpes virus 7-100                      | -             | Negative         | Negative           | -             | -                                      | 24.8   | -         | -        |
| P30        | 70  | 1      | 33        | 2021/10/11 | BALF     | Enterococcus faecium-24<br>Candida tropicalis-2240<br>Cytomegalovirus-96 | -             | -                | Candida tropicalis | -             | -                                      | -      | -         | -        |
| P31        | 84  | 1      | 34        | 2021/10/19 | BALF     | Candida albicans-139                                                     | -             | Negative         | Candida albicans   | -             | -                                      | -      | Negative  | -        |
| P32        | 57  | 1      | 35        | 2021/10/20 | BALF     | Negative                                                                 | Negative      | Negative         | -                  | -             | -                                      | -      | -         | -        |
| P33        | 48  | 2      | 36        | 2021/10/25 | BALF     | Streptococcus pneumoniae-165<br>Candida albicans-324                     | -             | Candida albicans | -                  | -             | -                                      | 22.3   | -         | Negative |
| P34        | 59  | 1      | 37        | 2021/10/25 | BALF     | Negative                                                                 | -             | -                | Candida albicans   | -             | -                                      | 12.5   | -         | -        |



| Patient ID | Age | Gender | Sample ID | mNGS       |          |                                                                                                                                                                                          | CMT           |                        |                  |                                             |                                        |        |           |        |
|------------|-----|--------|-----------|------------|----------|------------------------------------------------------------------------------------------------------------------------------------------------------------------------------------------|---------------|------------------------|------------------|---------------------------------------------|----------------------------------------|--------|-----------|--------|
|            |     |        |           | Date       | Specimen | Pathogens                                                                                                                                                                                | Blood culture | BALF culture           | Sputum culture   | Other culture                               | PCR Detection of respiratory pathogens | G test | GeneXpert | T-spot |
| P35        | 80  | 1      | 38        | 2021/10/29 | BALF     | Stenotrophomonas maltophilia-38<br>Mycobacterium tuberculosis complex-184<br>Enterococcus raffinosus-47<br>Burkholderia cenocepacia-34<br>Aspergillus niger-38<br>Candida albicans-44587 | Negative      | -                      | Candida albicans | Candida albicans (Tracheal secretion)       | -                                      | -      | -         | -      |
| P36        | 71  | 2      | 39        | 2021/11/2  | BALF     | Mycobacterium tuberculosis complex-22<br>Pseudomonas aeruginosa-532731                                                                                                                   | -             | Pseudomonas aeruginosa | Negative         | Pseudomonas aeruginosa (Tracheal secretion) | -                                      | -      | -         | -      |
| P37        | 49  | 1      | 40        | 2021/11/4  | Tissue   | Negative                                                                                                                                                                                 | -             | -                      | -                | Negative (Pus)                              | -                                      | -      | -         | -      |
| P38        | 84  | 2      | 41        | 2021/11/11 | BALF     | Corynebacterium striatum-942<br>Epstein-Barr virus-22<br>Human alphaherpesvirus 1-612                                                                                                    | -             | -                      | Negative         | Candida tropicalis (Urine)                  | -                                      | 10     | -         | -      |

| Patient ID | Age | Gender | Sample ID | mNGS       |          |                                                                                                                                                                                                                                                                           | CMT           |                        |                        |               |                                        |        |           |        |          |
|------------|-----|--------|-----------|------------|----------|---------------------------------------------------------------------------------------------------------------------------------------------------------------------------------------------------------------------------------------------------------------------------|---------------|------------------------|------------------------|---------------|----------------------------------------|--------|-----------|--------|----------|
|            |     |        |           | Date       | Specimen | Pathogens                                                                                                                                                                                                                                                                 | Blood culture | BALF culture           | Sputum culture         | Other culture | PCR Detection of respiratory pathogens | G test | GeneXpert | T-spot |          |
| P39        | 68  | 1      | 42        | 2021/11/16 | BALF     | Negative                                                                                                                                                                                                                                                                  | Negative      | -                      | Negative               | -             | -                                      | -      | -         | -      | -        |
| P40        | 77  | 1      | 43        | 2021/11/16 | BALF     | Streptococcus pneumoniae-44972<br>Candida tropicalis-523<br>Cytomegalovirus-500                                                                                                                                                                                           | -             | Candida tropicalis     | Candida tropicalis     | -             | -                                      | -      | -         | -      | -        |
| P41        | 14  | 1      | 44        | 2021/12/2  | BALF     | Human herpes virus 7-5                                                                                                                                                                                                                                                    | -             | Negative               | Negative               | -             | -                                      | 11.8   | -         | -      | -        |
| P42        | 58  | 2      | 45        | 2021/12/9  | BALF     | Negative                                                                                                                                                                                                                                                                  | -             | Negative               | -                      | -             | -                                      | -      | -         | -      | Negative |
| P43        | 58  | 1      | 46        | 2021/12/14 | BALF     | Negative                                                                                                                                                                                                                                                                  | -             | Negative               | Negative               | -             | -                                      | 10     | Negative  | -      | -        |
| P44        | 81  | 1      | 47        | 2021/12/21 | BALF     | Pseudomonas aeruginosa-37023<br>Staphylococcus cohnii-3565<br>Burkholderia multivorans-647<br>Corynebacterium striatum-54494<br>Enterococcus faecium-107<br>Stenotrophomonas maltophilia-253<br>Candida parapsilosis-331<br>Candida lusitaniae-2879<br>Cytomegalovirus-31 | Negative      | Pseudomonas aeruginosa | Pseudomonas aeruginosa | -             | -                                      | -      | -         | -      | -        |

| Patient ID | Age | Gender | Sample ID | mNGS       |          |                                                                                                                                                                            | CMT           |                       |                  |                  |                                        |        |           |        |          |
|------------|-----|--------|-----------|------------|----------|----------------------------------------------------------------------------------------------------------------------------------------------------------------------------|---------------|-----------------------|------------------|------------------|----------------------------------------|--------|-----------|--------|----------|
|            |     |        |           | Date       | Specimen | Pathogens                                                                                                                                                                  | Blood culture | BALF culture          | Sputum culture   | Other culture    | PCR Detection of respiratory pathogens | G test | GeneXpert | T-spot |          |
| P45        | 58  | 1      | 48        | 2021/12/21 | BALF     | Negative                                                                                                                                                                   | -             | Negative              | -                | -                | -                                      | -      | 33.9      | -      | -        |
| P46        | 38  | 1      | 49        | 2021/12/24 | BALF     | Negative                                                                                                                                                                   | -             | Negative              | -                | -                | -                                      | -      | -         | -      | -        |
| P47        | 51  | 2      | 51        | 2021/12/27 | BALF     | Candida albicans-63                                                                                                                                                        | Negative      | Negative              | Negative         | -                | -                                      | -      | -         | -      | -        |
| P47        |     |        | 53        | 2021/12/30 | blood    | Negative                                                                                                                                                                   | Negative      | Negative              | Negative         | Negative         | Negative (Pus)                         | -      | -         | -      | -        |
| P47        |     |        | 54        | 2021/12/31 | Tissue   | Negative                                                                                                                                                                   | Negative      | Negative              | Negative         | Negative         | Negative (Pus)                         | -      | -         | -      | -        |
| P48        | 82  | 1      | 52        | 2021/12/28 | BALF     | Klebsiella pneumoniae-14337<br>Enterococcus faecium-14979<br>Staphylococcus haemolyticus-7323<br>Candida glabrata-7571<br>Human herpes virus 7-39<br>Epstein-Barr virus-10 | -             | Klebsiella pneumoniae | -                | -                | -                                      | -      | 30.8      | -      | Negative |
| P49        | 59  | 1      | 55        | 2021/12/31 | BALF     | Corynebacterium amycolatum-28987<br>Pseudomonas aeruginosa-64<br>Candida tropicalis-1607<br>Candida lusitaniae-1094<br>Epstein-Barr virus-9                                | -             | -                     | Candida albicans | Negative (Urine) | Negative                               | -      | 101.4     | -      | -        |

| Patient ID | Age | Gender | Sample ID | mNGS          |          |                                                                                                     | CMT                   |                              |                              |                          |                                        |        |           |        |
|------------|-----|--------|-----------|---------------|----------|-----------------------------------------------------------------------------------------------------|-----------------------|------------------------------|------------------------------|--------------------------|----------------------------------------|--------|-----------|--------|
|            |     |        |           | Date          | Specimen | Pathogens                                                                                           | Blood culture         | BALF culture                 | Sputum culture               | Other culture            | PCR Detection of respiratory pathogens | G test | GeneXpert | T-spot |
| P49        |     |        | 56        | 2022/1/1      | blood    | Negative                                                                                            | -                     | -                            | Candida albicans             | Negative (Urine)         | Negative                               | 101.4  | -         | -      |
| P50        | 69  | 1      | 57        | 2022/1/1<br>1 | BALF     | Corynebacterium striatum-24<br>Stenotrophomonas maltophilia-1287<br>Betapapillomavirus 1-32         | -                     | Stenotrophomonas maltophilia | Stenotrophomonas maltophilia | -                        | -                                      | -      | -         | -      |
| P51        | 65  | 2      | 58        | 2022/1/1<br>2 | BALF     | Tropheryma whipplei-98                                                                              | -                     | Negative                     | Negative                     | -                        | -                                      | -      | Negative  | -      |
| P52        | 69  | 2      | 59        | 2022/1/1<br>3 | BALF     | Negative                                                                                            | -                     | Negative                     | -                            | Negative (Pus)           | -                                      | -      | Negative  | -      |
| P53        | 47  | 2      | 60        | 2022/1/1<br>4 | BALF     | Staphylococcus aureus-474487<br>Influenza B virus-32                                                | Staphylococcus aureus | Staphylococcus aureus        | Staphylococcus aureus        | -                        | Influenza B virus                      | 698.60 | -         | -      |
| P53        |     |        | 61        | 2022/1/1<br>4 | blood    | Staphylococcus aureus-1473                                                                          | Staphylococcus aureus | Staphylococcus aureus        | Staphylococcus aureus        | -                        | Influenza B virus                      | 698.60 | -         | -      |
| P54        | 61  | 1      | 62        | 2022/1/1<br>4 | BALF     | Candida albicans-54<br>Human alphaherpesvirus 1-42<br>Human herpes virus 7-23<br>Cytomegalovirus-20 | -                     | -                            | -                            | Negative (Ascitic fluid) | -                                      | -      | -         | -      |

| Patient ID | Age | Gender | Sample ID | mNGS      |          |                                                                                 | CMT           |                        |                        |               |                                        |        |           |          |          |
|------------|-----|--------|-----------|-----------|----------|---------------------------------------------------------------------------------|---------------|------------------------|------------------------|---------------|----------------------------------------|--------|-----------|----------|----------|
|            |     |        |           | Date      | Specimen | Pathogens                                                                       | Blood culture | BALF culture           | Sputum culture         | Other culture | PCR Detection of respiratory pathogens | G test | GeneXpert | T-spot   |          |
| P55        | 63  | 2      | 63        | 2022/1/17 | BALF     | Pseudomonas aeruginosa-61<br>Legionella pneumophila-1<br>Aspergillus flavus-236 | -             | Pseudomonas aeruginosa | Pseudomonas aeruginosa | -             | -                                      | -      | -         | -        | -        |
| P56        | 37  | 2      | 64        | 2022/1/18 | BALF     | Nocardia cyriacigeorgica-1<br>Human herpes virus 7-80<br>Epstein-Barr virus-337 | Negative      | Negative               | -                      | -             | -                                      | -      | -         | Negative | Negative |
| P57        | 41  | 1      | 65        | 2022/1/19 | BALF     | Staphylococcus aureus-138<br>Nocardia abscessus-4                               | -             | Negative               | -                      | -             | -                                      | -      | -         | -        | -        |
| P58        | 64  | 2      | 66        | 2022/1/19 | BALF     | Cytomegalovirus-4<br>Influenza B virus-16                                       | Negative      | Negative               | Filamentous fungi      | -             | -                                      | -      | -         | -        | -        |
| P59        | 65  | 1      | 67        | 2022/1/20 | BALF     | Staphylococcus capitis-38                                                       | -             | Negative               | Negative               | -             | -                                      | -      | -         | -        | -        |
| P60        | 46  | 2      | 68        | 2022/1/21 | BALF     | Trichoderma harzianum-68                                                        | -             | Negative               | Negative               | -             | -                                      | -      | -         | -        | -        |
| P61        | 42  | 1      | 69        | 2022/1/21 | blood    | Negative                                                                        | -             | Negative               | Negative               | -             | -                                      | -      | -         | -        | Negative |
| P61        |     |        | 70        | 2022/1/21 | Sputum   | Mycobacterium smegmatis-100<br>Chlamydia psittaci-1<br>Epstein-Barr             | -             | Negative               | Negative               | -             | -                                      | -      | -         | -        | Negative |

| Patient ID | Age | Gender | Sample ID | mNGS      |          |                                                            | CMT           |                  |                              |               |                                        |        |           |          |
|------------|-----|--------|-----------|-----------|----------|------------------------------------------------------------|---------------|------------------|------------------------------|---------------|----------------------------------------|--------|-----------|----------|
|            |     |        |           | Date      | Specimen | Pathogens                                                  | Blood culture | BALF culture     | Sputum culture               | Other culture | PCR Detection of respiratory pathogens | G test | GeneXpert | T-spot   |
|            |     |        |           |           |          | virus-39<br>Human herpes virus 7-3                         |               |                  |                              |               |                                        |        |           |          |
| P61        |     |        | 71        | 2022/1/25 | BALF     | Chlamydia psittaci-1                                       | -             | Negative         | Stenotrophomonas maltophilia | -             | -                                      | -      | -         | -        |
| P62        | 30  | 1      | 72        | 2022/1/26 | BALF     | Candida parapsilosis-23                                    | -             | Negative         | Negative                     | -             | -                                      | -      | -         | -        |
| P62        |     |        | 73        | 2022/1/26 | BALF     | Corynebacterium accolens-112<br>Staphylococcus aureus-8069 | -             | Negative         | Negative                     | -             | -                                      | -      | -         | -        |
| P63        | 67  | 1      | 74        | 2022/1/27 | BALF     | Epstein-Barr virus-11<br>Human alphaherpesvirus 1-22       | -             | Negative         | Negative                     | -             | -                                      | -      | -         | -        |
| P64        | 59  | 2      | 75        | 2022/2/10 | blood    | Negative                                                   | Negative      | Negative         | -                            | -             | -                                      | 143.5  | -         | Negative |
| P64        |     |        | 77        | 2022/2/16 | BALF     | Enterococcus faecium-57<br>Corynebacterium striatum-53     | Negative      | Negative         | -                            | -             | -                                      | 160    | -         | -        |
| P65        | 43  | 1      | 76        | 2022/2/14 | BALF     | Mycobacterium tuberculosis complex-620900                  | Negative      | Candida albicans | Candida albicans             | -             | -                                      | -      | -         | Positive |

| Patient ID | Age | Gender | Sample ID | mNGS      |          |                                                                                                                                                                                  | CMT           |                  |                  |               |                                        |        |           |          |
|------------|-----|--------|-----------|-----------|----------|----------------------------------------------------------------------------------------------------------------------------------------------------------------------------------|---------------|------------------|------------------|---------------|----------------------------------------|--------|-----------|----------|
|            |     |        |           | Date      | Specimen | Pathogens                                                                                                                                                                        | Blood culture | BALF culture     | Sputum culture   | Other culture | PCR Detection of respiratory pathogens | G test | GeneXpert | T-spot   |
|            |     |        |           |           |          | Candida albicans-1610<br>Human herpes virus 7-4                                                                                                                                  |               |                  |                  |               |                                        |        |           |          |
| P66        | 64  | 1      | 78        | 2022/2/21 | Sputum   | Bilophila wadsworthia-508<br>Human herpes virus 7-13                                                                                                                             | -             | Negative         | -                | -             | -                                      | -      | -         | Negative |
| P67        | 19  | 2      | 79        | 2022/2/22 | BALF     | Rhizopus nigricans-47                                                                                                                                                            | -             | -                | -                | -             | -                                      | -      | -         | Negative |
| P67        |     |        | 111       | 2022/6/15 | BALF     | Corynebacterium striatum-27                                                                                                                                                      | -             | Negative         | -                | -             | -                                      | -      | -         | -        |
| P68        | 58  | 1      | 80        | 2022/3/1  | BALF     | Negative                                                                                                                                                                         | -             | Negative         | -                | -             | -                                      | -      | -         | -        |
| P69        | 73  | 2      | 81        | 2022/3/3  | BALF     | Corynebacterium striatum-1037<br>Enterococcus faecium-116<br>Pseudomonas aeruginosa-52<br>Streptococcus pneumoniae-3316<br>Epstein-Barr virus-216<br>Human alphaherpesvirus 1-13 | -             | Negative         | -                | -             | -                                      | 24.8   | -         | Negative |
| P70        | 28  | 2      | 82        | 2022/3/8  | BALF     | Negative                                                                                                                                                                         | -             | Negative         | -                | -             | -                                      | -      | -         | Negative |
| P71        | 73  | 1      | 83        | 2022/3/14 | BALF     | Enterococcus faecium-54744<br>Corynebacterium striatum-115                                                                                                                       | -             | Candida glabrata | Candida glabrata | -             | -                                      | -      | -         | -        |

| Patient ID | Age | Gender | Sample ID | mNGS      |          |                                                                                   | CMT           |                  |                  |               |                                        |        |           |          |
|------------|-----|--------|-----------|-----------|----------|-----------------------------------------------------------------------------------|---------------|------------------|------------------|---------------|----------------------------------------|--------|-----------|----------|
|            |     |        |           | Date      | Specimen | Pathogens                                                                         | Blood culture | BALF culture     | Sputum culture   | Other culture | PCR Detection of respiratory pathogens | G test | GeneXpert | T-spot   |
|            |     |        |           |           |          | Candida glabrata-661<br>Candida albicans-263908                                   |               |                  |                  |               |                                        |        |           |          |
| P72        | 80  | 1      | 84        | 2022/3/17 | Tissue   | Chroococcidiopsis thermalis-250                                                   | -             | Candida albicans | Candida albicans | -             | -                                      | -      | -         | -        |
| P73        | 63  | 1      | 85        | 2022/3/18 | BALF     | Streptococcus pneumoniae-781<br>Corynebacterium accolens-169<br>Rhinovirus C-1605 | Negative      | Negative         | Negative         | -             | -                                      | -      | -         | -        |
| P74        | 61  | 2      | 86        | 2022/3/22 | BALF     | Negative                                                                          | -             | Negative         | Negative         | -             | -                                      | -      | -         | -        |
| P74        |     |        | 89        | 2022/3/25 | Sputum   | Negative                                                                          | -             | Negative         | Negative         | -             | -                                      | -      | -         | -        |
| P75        | 53  | 2      | 87        | 2022/3/24 | BALF     | Negative                                                                          | -             | Negative         | -                | -             | -                                      | 19.5   | -         | Negative |
| P76        | 58  | 1      | 88        | 2022/3/24 | BALF     | Corynebacterium accolens-343                                                      | -             | -                | Negative         | -             | -                                      | 16.7   | -         | -        |
| P77        | 69  | 1      | 90        | 2022/3/31 | BALF     | Human herpes virus 7-3                                                            | -             | Negative         | -                | -             | -                                      | -      | -         | -        |
| P78        | 58  | 2      | 91        | 2022/4/7  | BALF     | Negative                                                                          | -             | Negative         | Negative         | -             | -                                      | -      | -         | -        |



| Patient ID | Age | Gender | Sample ID | mNGS      |          |                                                                                                                                                                                               | CMT           |                  |                  |                  |                                        |        |           |        |
|------------|-----|--------|-----------|-----------|----------|-----------------------------------------------------------------------------------------------------------------------------------------------------------------------------------------------|---------------|------------------|------------------|------------------|----------------------------------------|--------|-----------|--------|
|            |     |        |           | Date      | Specimen | Pathogens                                                                                                                                                                                     | Blood culture | BALF culture     | Sputum culture   | Other culture    | PCR Detection of respiratory pathogens | G test | GeneXpert | T-spot |
| P79        | 77  | 1      | 92        | 2022/4/8  | BALF     | Klebsiella pneumoniae-34<br>Epstein-Barr virus-14                                                                                                                                             | -             | Negative         | -                | Negative (Urine) | -                                      | -      | -         | -      |
| P80        | 65  | 1      | 93        | 2022/4/15 | BALF     | Negative                                                                                                                                                                                      | -             | Negative         | -                | -                | -                                      | -      | -         | -      |
| P80        |     |        | 94        | 2022/4/15 | BALF     | Negative                                                                                                                                                                                      | -             | Negative         | -                | -                | -                                      | -      | -         | -      |
| P81        | 87  | 2      | 95        | 2022/4/17 | BALF     | Corynebacterium striatum-191<br>Pseudomonas aeruginosa-2001<br>Enterococcus faecium-69<br>Leuconostoc citreum-64<br>Trichosporon asahii-191<br>Candida lusitaniae-91<br>Candida albicans-1626 | -             | Candida albicans | Candida albicans | -                | -                                      | -      | -         | -      |
| P82        | 62  | 2      | 96        | 2022/4/18 | BALF     | Human alphaherpesvirus 1-6                                                                                                                                                                    | -             | Negative         | -                | -                | -                                      | 44.2   | -         | -      |
| P83        | 53  | 1      | 97        | 2022/4/19 | Tissue   | Fusobacterium nucleatum-72                                                                                                                                                                    | -             | -                | Negative         | -                | -                                      | -      | -         | -      |
| P84        | 65  | 2      | 98        | 2022/4/20 | BALF     | Negative                                                                                                                                                                                      | -             | Negative         | -                | -                | -                                      | -      | -         | -      |

| Patient ID | Age | Gender | Sample ID | mNGS      |          |                                                                                            | CMT           |              |                       |                |                                        |        |           |          |
|------------|-----|--------|-----------|-----------|----------|--------------------------------------------------------------------------------------------|---------------|--------------|-----------------------|----------------|----------------------------------------|--------|-----------|----------|
|            |     |        |           | Date      | Specimen | Pathogens                                                                                  | Blood culture | BALF culture | Sputum culture        | Other culture  | PCR Detection of respiratory pathogens | G test | GeneXpert | T-spot   |
| P85        | 58  | 1      | 99        | 2022/4/24 | BALF     | Klebsiella pneumoniae-582256<br>Pseudomonas aeruginosa-129                                 | -             | Negative     | Klebsiella pneumoniae | -              | Human metapneumovirus                  | -      | -         | -        |
| P86        | 67  | 1      | 100       | 2022/4/29 | Sputum   | Corynebacterium striatum-10388<br>Epstein-Barr virus-5                                     | -             | -            | Negative              | -              | -                                      | -      | -         | -        |
| P87        | 81  | 2      | 101       | 2022/5/7  | Sputum   | Candida tropicalis-1613<br>Epstein-Barr virus-25                                           | -             | -            | Candida albicans      | -              | -                                      | -      | Negative  | -        |
| P87        |     |        | 102       | 2022/5/11 | BALF     | Negative                                                                                   | -             | Negative     | -                     | -              | -                                      | -      | Negative  | -        |
| P88        | 47  | 2      | 103       | 2022/5/19 | BALF     | Negative                                                                                   | -             | Negative     | Negative              | -              | -                                      | 105    | -         | -        |
| P89        | 20  | 2      | 104       | 2022/5/24 | BALF     | Mycobacterium tuberculosis complex-2913<br>Cryptococcus neoformans-6                       | -             | Negative     | -                     | -              | -                                      | 15.8   | -         | Positive |
| P90        | 67  | 2      | 105       | 2022/5/26 | BALF     | Streptococcus pneumoniae-57                                                                | -             | -            | Negative              | -              | -                                      | 20.4   | Negative  | Negative |
| P91        | 71  | 1      | 106       | 2022/5/30 | BALF     | Mycobacterium tuberculosis complex-63045<br>Candida albicans-323<br>Human herpes virus 7-4 | Negative      | -            | Candida albicans      | Negative (Pus) | -                                      | -      | Positive  | -        |

| Patient ID | Age | Gender | Sample ID | mNGS      |          |                                                                                                                                                                                      | CMT           |              |                         |                               |                                        |        |           |          |
|------------|-----|--------|-----------|-----------|----------|--------------------------------------------------------------------------------------------------------------------------------------------------------------------------------------|---------------|--------------|-------------------------|-------------------------------|----------------------------------------|--------|-----------|----------|
|            |     |        |           | Date      | Specimen | Pathogens                                                                                                                                                                            | Blood culture | BALF culture | Sputum culture          | Other culture                 | PCR Detection of respiratory pathogens | G test | GeneXpert | T-spot   |
| P92        | 78  | 1      | 107       | 2022/5/30 | blood    | Negative                                                                                                                                                                             | Negative      | -            | -                       | Negative (Pus, Ascitic fluid) | -                                      | -      | -         | -        |
| P93        | 71  | 2      | 108       | 2022/6/6  | BALF     | Negative                                                                                                                                                                             | -             | Negative     | -                       | -                             | -                                      | -      | -         | -        |
| P94        | 82  | 1      | 109       | 2022/6/10 | BALF     | Tropheryma whipplei-406<br>Klebsiella pneumoniae-278327                                                                                                                              | -             | -            | Acinetobacter baumannii | -                             | -                                      | -      | Negative  | Negative |
| P95        | 75  | 2      | 110       | 2022/6/12 | BALF     | Pseudomonas aeruginosa-52975<br>Haemophilus influenzae-407<br>Achromobacter xylosoxidans-9268<br>Corynebacterium striatum-74631<br>Human alphaherpesvirus 1-548<br>Cytomegalovirus-8 | Negative      | -            | Pseudomonas aeruginosa  | -                             | -                                      | -      | -         | -        |
| P96        | 79  | 2      | 112       | 2022/6/17 | BALF     | Negative                                                                                                                                                                             | -             | Negative     | Negative                | -                             | -                                      | 15.1   | -         | -        |
| P97        | 50  | 1      | 113       | 2022/6/22 | BALF     | Klebsiella pneumoniae-2826                                                                                                                                                           | Negative      | Negative     | Negative                | -                             | -                                      | 8.1    | Negative  | -        |
| P97        |     |        | 114       | 2022/6/29 | blood    | Negative                                                                                                                                                                             | Negative      | Negative     | Negative                | -                             | -                                      | 8.1    | Negative  | -        |

| Patient ID | Age | Gender | Sample ID | mNGS      |          |                                                                                                                         | CMT           |                         |                         |                                  |                                        |        |           |          |   |
|------------|-----|--------|-----------|-----------|----------|-------------------------------------------------------------------------------------------------------------------------|---------------|-------------------------|-------------------------|----------------------------------|----------------------------------------|--------|-----------|----------|---|
|            |     |        |           | Date      | Specimen | Pathogens                                                                                                               | Blood culture | BALF culture            | Sputum culture          | Other culture                    | PCR Detection of respiratory pathogens | G test | GeneXpert | T-spot   |   |
| P98        | 62  | 1      | 115       | 2022/7/5  | BALF     | Negative                                                                                                                | -             | -                       | Negative                | -                                | -                                      | -      | -         | -        | - |
| P99        | 56  | 1      | 116       | 2022/7/7  | BALF     | Streptococcus pneumoniae-229<br>Pseudomonas aeruginosa-12753                                                            | Negative      | Pseudomonas aeruginosa  | Negative                | -                                | -                                      | -      | -         | -        | - |
| P100       | 73  | 1      | 117       | 2022/7/7  | BALF     | Corynebacterium striatum-22<br>Candida glabrata-391<br>Epstein-Barr virus-159                                           | -             | Negative                | -                       | -                                | -                                      | -      | -         | -        | - |
| P101       | 34  | 2      | 118       | 2022/7/11 | BALF     | Mycoplasma pneumoniae-1                                                                                                 | -             | -                       | -                       | -                                | Human adenovirus<br>Coxsackievirus B   | 21.4   | Negative  | -        |   |
| P102       | 67  | 1      | 119       | 2022/7/13 | BALF     | Human herpes virus 7-5                                                                                                  | -             | -                       | -                       | -                                | -                                      | 86.4   | -         | Negative |   |
| P103       | 73  | 1      | 120       | 2022/7/18 | BALF     | Epstein-Barr virus-3                                                                                                    | -             | Negative                | Negative                | -                                | -                                      | -      | -         | -        |   |
| P104       | 71  | 1      | 121       | 2022/7/21 | BALF     | Acinetobacter baumannii-39785<br>Nocardia cyriacigeorgica-27443<br>Aspergillus lentulus-57<br>Pneumocystis jirovecii-41 | -             | Acinetobacter baumannii | Acinetobacter baumannii | Acinetobacter baumannii (Tissue) | -                                      | 238.8  | -         | -        |   |

| Patient ID | Age | Gender | Sample ID | mNGS      |          |                                                                                         | CMT           |                        |                |               |                                        |        |           |          |
|------------|-----|--------|-----------|-----------|----------|-----------------------------------------------------------------------------------------|---------------|------------------------|----------------|---------------|----------------------------------------|--------|-----------|----------|
|            |     |        |           | Date      | Specimen | Pathogens                                                                               | Blood culture | BALF culture           | Sputum culture | Other culture | PCR Detection of respiratory pathogens | G test | GeneXpert | T-spot   |
|            |     |        |           |           |          | Epstein-Barr virus-1296<br>Cytomegalovirus-841                                          |               |                        |                |               |                                        |        |           |          |
| P105       | 61  | 1      | 122       | 2022/7/26 | BALF     | Corynebacterium accolens-146<br>Pseudomonas aeruginosa-226385<br>Epstein-Barr virus-12  | Negative      | Pseudomonas aeruginosa | Negative       | -             | -                                      | 7.4    | -         | -        |
| P105       |     |        | 123       | 2022/7/26 | blood    | Pseudomonas aeruginosa-563<br>Epstein-Barr virus-3                                      | Negative      | Pseudomonas aeruginosa | Negative       | -             | -                                      | 7.4    | -         | -        |
| P106       | 52  | 2      | 124       | 2022/7/29 | BALF     | Mycobacterium tuberculosis complex-405759<br>Candida glabrata-52<br>Candida albicans-99 | Negative      | Negative               | -              | -             | -                                      | 20     | -         | Positive |

| Patient ID | Age | Gender | Sample ID | mNGS     |          |                                                                                                                                                                                                                  | CMT                    |                  |                                      |               |                                        |        |           |        |   |
|------------|-----|--------|-----------|----------|----------|------------------------------------------------------------------------------------------------------------------------------------------------------------------------------------------------------------------|------------------------|------------------|--------------------------------------|---------------|----------------------------------------|--------|-----------|--------|---|
|            |     |        |           | Date     | Specimen | Pathogens                                                                                                                                                                                                        | Blood culture          | BALF culture     | Sputum culture                       | Other culture | PCR Detection of respiratory pathogens | G test | GeneXpert | T-spot |   |
| P107       | 66  | 1      | 125       | 2022/8/2 | BALF     | Mycobacterium tuberculosis complex-6975<br>Moraxella atlantae-378<br>Streptococcus pneumoniae-747<br>Mycobacterium avium complex-11756<br>Candida albicans-74<br>Human herpes virus 7-12<br>Epstein-Barr virus-4 | Negative               | -                | -                                    | -             | -                                      | -      | -         | -      | - |
| P108       | 75  | 1      | 126       | 2022/8/2 | BALF     | Mycobacterium tuberculosis complex-8824<br>Klebsiella pneumoniae-54<br>Staphylococcus warneri-42                                                                                                                 | -                      | Negative         | Klebsiella pneumoniae                | -             | -                                      | -      | -         | -      | - |
| P109       | 74  | 1      | 127       | 2022/8/4 | BALF     | Bacillus cereus group-33<br>Corynebacterium accolens-116<br>Moraxella catarrhalis-160<br>Candida parapsilosis-10055<br>Kodamaea ohmeri-23306<br>Meyerozyma caribbica-827<br>Candida lusitaniae-257954            | Staphylococcus xylosus | Candida albicans | Candida albicans<br>Candida glabrata | -             | -                                      | -      | -         | -      | - |

| Patient ID | Age | Gender | Sample ID | mNGS      |          |                                                                                                                    | CMT           |              |                        |                   |                                        |        |           |          |   |
|------------|-----|--------|-----------|-----------|----------|--------------------------------------------------------------------------------------------------------------------|---------------|--------------|------------------------|-------------------|----------------------------------------|--------|-----------|----------|---|
|            |     |        |           | Date      | Specimen | Pathogens                                                                                                          | Blood culture | BALF culture | Sputum culture         | Other culture     | PCR Detection of respiratory pathogens | G test | GeneXpert | T-spot   |   |
| P110       | 75  | 2      | 128       | 2022/8/5  | BALF     | Mycobacterium tuberculosis complex-2127<br>Klebsiella pneumoniae-35<br>Candida lusitaniae-24                       | -             | Negative     | -                      | -                 | -                                      | -      | -         | -        | - |
| P111       | 37  | 2      | 129       | 2022/8/10 | Tissue   | Negative                                                                                                           | -             | -            | -                      | Negative (Tissue) | -                                      | 16.1   | -         | Negative |   |
| P112       | 69  | 1      | 130       | 2022/8/11 | BALF     | Streptococcus pneumoniae-99                                                                                        | Negative      | Negative     | Negative               | -                 | -                                      | -      | -         | -        |   |
| P113       | 66  | 2      | 131       | 2022/8/16 | BALF     | Pseudomonas aeruginosa-474511<br>Escherichia coli-2178<br>Corynebacterium accolens-367<br>Aspergillus fumigatus-24 | -             | -            | Pseudomonas aeruginosa | -                 | -                                      | 159.6  | -         | Negative |   |
| P114       | 68  | 1      | 132       | 2022/8/16 | BALF     | Pseudomonas aeruginosa-22                                                                                          | -             | Negative     | -                      | -                 | -                                      | -      | -         | -        |   |
| P115       | 16  | 1      | 133       | 2022/8/16 | BALF     | Mycoplasma pneumoniae-1106<br>Pseudomonas aeruginosa-54                                                            | -             | Negative     | Negative               | -                 | -                                      | -      | -         | Negative |   |
| P116       | 17  | 2      | 134       | 2022/8/25 | BALF     | Mycoplasma pneumoniae-5309<br>Candida albicans-997                                                                 | -             | Negative     | Negative               | -                 | -                                      | -      | -         | -        |   |
| P117       | 57  | 1      | 135       | 2022/8/29 | BALF     | Negative                                                                                                           | -             | -            | Negative               | -                 | Negative                               | 5.6    | -         | -        |   |

| Patient ID | Age | Gender | Sample ID | mNGS      |          |                                                                                                                      | CMT           |              |                        |                            |                                        |        |           |          |          |
|------------|-----|--------|-----------|-----------|----------|----------------------------------------------------------------------------------------------------------------------|---------------|--------------|------------------------|----------------------------|----------------------------------------|--------|-----------|----------|----------|
|            |     |        |           | Date      | Specimen | Pathogens                                                                                                            | Blood culture | BALF culture | Sputum culture         | Other culture              | PCR Detection of respiratory pathogens | G test | GeneXpert | T-spot   |          |
| P118       | 67  | 1      | 136       | 2022/8/30 | BALF     | Negative                                                                                                             | -             | Negative     | -                      | -                          | -                                      | -      | -         | -        | -        |
| P119       | 50  | 1      | 137       | 2022/8/31 | BALF     | Nocardia cyriacigeorgica-22<br>Aspergillus fumigatus-210<br>Human herpes virus 7-113<br>Epstein-Barr virus-90        | -             | Negative     | Pseudomonas aeruginosa | -                          | -                                      | -      | -         | -        | Negative |
| P120       | 39  | 1      | 138       | 2022/9/6  | Sputum   | Serratia marcescens-54<br>Tropheryma whipplei-53<br>Human herpes virus 7-106                                         | -             | -            | Negative               | -                          | -                                      | -      | -         | -        | Negative |
| P120       |     |        | 139       | 2022/9/8  | BALF     | Negative                                                                                                             | -             | -            | Negative               | -                          | -                                      | -      | -         | -        | Negative |
| P121       | 55  | 1      | 140       | 2022/9/9  | BALF     | Schaalia meyeri-3624<br>Human herpes virus 7-3                                                                       | Negative      | Negative     | -                      | -                          | -                                      | -      | -         | Negative | Negative |
| P122       | 60  | 1      | 141       | 2022/9/15 | Sputum   | Enterococcus faecium-294<br>Epstein-Barr virus-1075                                                                  | -             | Negative     | Candida albicans       | -                          | -                                      | 102.40 | -         | -        | -        |
| P123       | 59  | 1      | 142       | 2022/9/23 | BALF     | Streptococcus pneumoniae-124<br>Acinetobacter baumannii-93<br>Corynebacterium striatum-355<br>Human herpes virus 7-8 | Negative      | Negative     | Negative               | Negative (Bronchial brush) | -                                      | -      | -         | -        | -        |



| Patient ID | Age | Gender | Sample ID | mNGS      |          |                                                                                                                                                                         | CMT           |              |                       |                |                                        |        |           |        |          |
|------------|-----|--------|-----------|-----------|----------|-------------------------------------------------------------------------------------------------------------------------------------------------------------------------|---------------|--------------|-----------------------|----------------|----------------------------------------|--------|-----------|--------|----------|
|            |     |        |           | Date      | Specimen | Pathogens                                                                                                                                                               | Blood culture | BALF culture | Sputum culture        | Other culture  | PCR Detection of respiratory pathogens | G test | GeneXpert | T-spot |          |
| P124       | 71  | 1      | 143       | 2022/9/27 | BALF     | Nocardia cyriacigeorgica-1<br>Klebsiella pneumoniae-126<br>Candida albicans-229                                                                                         | -             | Negative     | Klebsiella pneumoniae | -              | -                                      | -      | -         | -      | -        |
| P125       | 68  | 1      | 144       | 2022/9/29 | BALF     | Klebsiella pneumoniae-186276                                                                                                                                            | -             | -            | Klebsiella pneumoniae | Negative (Pus) | -                                      | -      | -         | -      | -        |
| P126       | 50  | 1      | 145       | 2022/9/29 | BALF     | Epstein-Barr virus-35                                                                                                                                                   | -             | Negative     | -                     | -              | -                                      | -      | -         | -      | Negative |
| P127       | 37  | 1      | 146       | 2022/9/30 | BALF     | Mycoplasma pneumoniae-13<br>Human herpes virus 7-38                                                                                                                     | -             | Negative     | Negative              | -              | Negative                               | -      | -         | -      | -        |
| P128       | 56  | 1      | 147       | 2022/9/30 | BALF     | Nocardia cyriacigeorgica-1<br>Legionella pneumophila-50<br>Klebsiella pneumoniae-33<br>Pseudomonas chlororaphis-147<br>Tropheryma whipplei-14489<br>Candida albicans-49 | Negative      | -            | Negative              | -              | -                                      | -      | -         | -      | -        |

| Patient ID | Age | Gender | Sample ID | mNGS       |          |                                                                                                                                                              | CMT           |              |                  |                |                                        |        |           |        |   |
|------------|-----|--------|-----------|------------|----------|--------------------------------------------------------------------------------------------------------------------------------------------------------------|---------------|--------------|------------------|----------------|----------------------------------------|--------|-----------|--------|---|
|            |     |        |           | Date       | Specimen | Pathogens                                                                                                                                                    | Blood culture | BALF culture | Sputum culture   | Other culture  | PCR Detection of respiratory pathogens | G test | GeneXpert | T-spot |   |
| P129       | 71  | 1      | 148       | 2022/10/9  | BALF     | Acinetobacter baumannii-1189<br>Haemophilus influenzae-19267<br>Pseudomonas aeruginosa-541<br>Klebsiella quasipneumoniae-151<br>Human alphaherpesvirus 1-238 | Negative      | -            | Candida albicans | -              | -                                      | -      | -         | -      | - |
| P130       | 63  | 2      | 149       | 2022/10/9  | BALF     | Negative                                                                                                                                                     | -             | Negative     | Negative         | -              | -                                      | -      | -         | -      | - |
| P131       | 59  | 1      | 150       | 2022/10/11 | BALF     | Negative                                                                                                                                                     | -             | Negative     | -                | -              | -                                      | -      | -         | -      | - |
| P132       | 59  | 2      | 151       | 2022/10/11 | BALF     | Elizabethkingia anophelis-69<br>Achromobacter xylosoxidans-58<br>Epstein-Barr virus-17                                                                       | -             | Negative     | -                | -              | Negative                               | -      | -         | -      |   |
| P133       | 34  | 1      | 152       | 2022/10/13 | BALF     | Aspergillus ruber-39<br>Epstein-Barr virus-11                                                                                                                | -             | Negative     | -                | -              | -                                      | -      | -         | -      |   |
| P134       | 57  | 1      | 153       | 2022/10/18 | BALF     | Staphylococcus hominis-32                                                                                                                                    | -             | Negative     | Negative         | -              | -                                      | -      | Negative  | -      |   |
| P135       | 65  | 2      | 154       | 2022/10/19 | Sputum   | Legionella pneumophila-1<br>Human alphaherpesvirus 1-1181<br>Epstein-Barr virus-2450                                                                         | -             | -            | Negative         | -              | -                                      | 1537.6 | -         | -      |   |
| P136       | 56  | 1      | 155       | 2022/10/25 | BALF     | Human herpes virus 7-10                                                                                                                                      | -             | Negative     | -                | Negative (Pus) | -                                      | 13.1   | -         | -      |   |

| Patient ID | Age | Gender | Sample ID | mNGS      |          |                                                                     | CMT           |              |                |               |                                        |          |           |        |   |
|------------|-----|--------|-----------|-----------|----------|---------------------------------------------------------------------|---------------|--------------|----------------|---------------|----------------------------------------|----------|-----------|--------|---|
|            |     |        |           | Date      | Specimen | Pathogens                                                           | Blood culture | BALF culture | Sputum culture | Other culture | PCR Detection of respiratory pathogens | G test   | GeneXpert | T-spot |   |
| P137       | 39  | 2      | 156       | 2022/11/3 | BALF     | Corynebacterium pseudodiphtheriticum-30<br>Human polyomavirus 4-153 | Negative      | -            | -              | -             | -                                      | Negative | -         | -      | - |
